# Supplementary material for: Association of low-dosage systemic corticosteroid use with disease burden in asthma
Source: PubMed Central journal article supplement (PMC7403577; doi:10.1038/s41533-020-00192-x), 2020-08-04
Supplement: 41533_2020_192_MOESM2_ESM.pdf [file 41533_2020_192_MOESM2_ESM.pdf]

**Supplementary Figure 1.** Mean prescribed SCS dosage before and after the index date

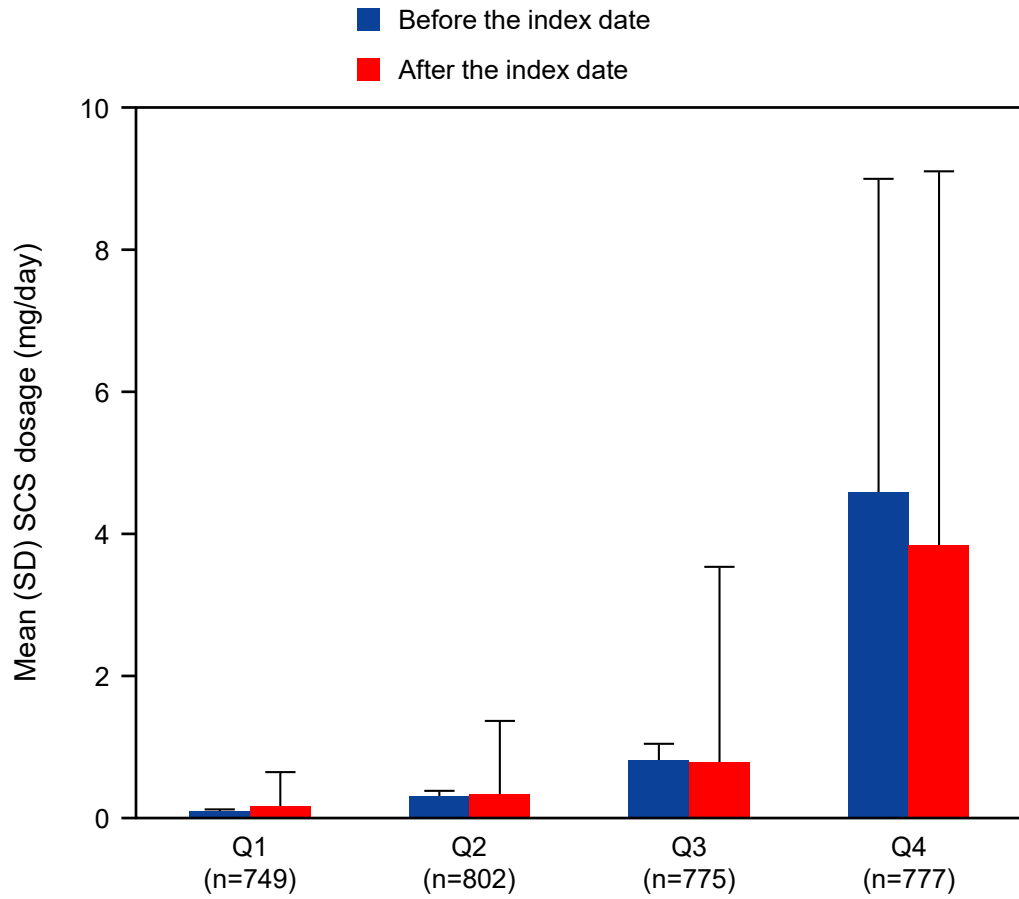

Error bars in the figure represent SD.

Q quartile, SCS systemic corticosteroids, SD standard deviation

**Supplementary Table 1.** Asthma severity and control status before and after the index date

|                                                   |                               | Severity and control status after the index date |              |              |                         |              |              |
|---------------------------------------------------|-------------------------------|--------------------------------------------------|--------------|--------------|-------------------------|--------------|--------------|
|                                                   |                               | Severe asthma                                    |              |              | Mild to moderate asthma |              |              |
|                                                   |                               | Total                                            | Uncontrolled | Controlled   | Total                   | Uncontrolled | Controlled   |
| Severity and control status before the index date |                               | <i>n</i> (%)                                     | <i>n</i> (%) | <i>n</i> (%) | <i>n</i> (%)            | <i>n</i> (%) | <i>n</i> (%) |
| Severe asthma                                     | <i>N</i> = 581 <sup>a</sup>   | 453 (78.0)                                       | 151 (26.0)   | 302 (52.0)   | 128 (22.0)              | 28 (4.8)     | 100 (17.2)   |
| Uncontrolled                                      | <i>N</i> = 193 <sup>a</sup>   | 154 (79.8)                                       | 118 (61.1)   | 36 (18.7)    | 39 (20.2)               | 23 (11.9)    | 16 (8.3)     |
| Controlled                                        | <i>N</i> = 388 <sup>a</sup>   | 299 (77.1)                                       | 33 (8.5)     | 266 (68.6)   | 89 (22.9)               | 5 (1.3)      | 84 (21.6)    |
| Mild to moderate asthma                           | <i>N</i> = 6,190 <sup>a</sup> | 326 (5.3)                                        | 76 (1.2)     | 250 (4.0)    | 5,864 (94.7)            | 976 (15.8)   | 4,888 (79.0) |
| Uncontrolled                                      | <i>N</i> = 1,118 <sup>a</sup> | 88 (7.9)                                         | 55 (4.9)     | 33 (3.0)     | 1,030 (92.1)            | 728 (65.1)   | 302 (27.0)   |
| Controlled                                        | <i>N</i> = 5,072 <sup>a</sup> | 238 (4.7)                                        | 21 (0.4)     | 217 (4.3)    | 4,834 (95.3)            | 248 (4.9)    | 4,586 (90.4) |

<sup>a</sup>The analysis of asthma control and severity was conducted only in cases where the multifaceted decision criteria according to the definitions in the European Respiratory Society/American Thoracic Society guidelines were definitively verified.

**Supplementary Table 2.** Exacerbation-related events

|                                       | Non-SCS<br>N = 7,476 | Q1<br>N = 749            | Q2<br>N = 802          | Q3<br>N = 775             | Q4<br>N = 777             |
|---------------------------------------|----------------------|--------------------------|------------------------|---------------------------|---------------------------|
| <b>Hospitalization</b>                |                      |                          |                        |                           |                           |
| Mean (SD), days/year                  | 0.78 (11.41)         | 0.37 (3.08)              | 0.63 (4.16)            | 1.21 (15.16)              | 4.58 (25.89)              |
| Unadjusted rate ratio (95% CI)        | Reference            | 0.475<br>(0.191–1.181)   | 0.802<br>(0.333–1.930) | 1.545<br>(0.636–3.749)    | 5.844<br>(2.392–14.273)   |
| Adjusted rate ratio (95% CI)          | Reference            | 0.483<br>(0.193–1.209)   | 0.795<br>(0.329–1.921) | 1.582<br>(0.648–3.861)    | 5.784<br>(2.355–14.207)   |
| <b>Intermittent SCS prescriptions</b> |                      |                          |                        |                           |                           |
| Mean (SD), times/year                 | 0.10 (0.55)          | 1.04 (4.04)              | 0.73 (2.98)            | 1.60 (13.30)              | 1.77 (3.25)               |
| Unadjusted rate ratio (95% CI)        | Reference            | 10.308<br>(8.389–12.665) | 7.300<br>(5.946–8.961) | 15.923<br>(13.051–19.427) | 17.632<br>(14.466–21.492) |
| Adjusted rate ratio (95% CI)          | Reference            | 10.518<br>(8.556–12.929) | 7.235<br>(5.888–8.889) | 16.075<br>(13.152–19.646) | 17.127<br>(14.054–20.873) |

CI confidence interval, SCS systemic corticosteroids, SD standard deviation, Q quartile

**Supplementary Table 3. Corticosteroid-related comorbidities**

|                                | Non-SCS<br>N = 7,476 | Q1<br>N = 749          | Q2<br>N = 802          | Q3<br>N = 775          | Q4<br>N = 777            |
|--------------------------------|----------------------|------------------------|------------------------|------------------------|--------------------------|
| Dyslipidaemia                  |                      |                        |                        |                        |                          |
| <i>n</i> (%)                   | 1,778 (23.8)         | 152 (20.3)             | 176 (21.9)             | 151 (19.5)             | 219 (28.2)               |
| Unadjusted odds ratio (95% CI) | Reference            | 0.816<br>(0.678–0.983) | 0.901<br>(0.756–1.074) | 0.776<br>(0.644–0.934) | 1.258<br>(1.066–1.484)   |
| Adjusted odds ratio (95% CI)   | Reference            | 0.883<br>(0.725–1.074) | 0.933<br>(0.775–1.123) | 0.774<br>(0.636–0.941) | 1.106<br>(0.928–1.318)   |
| Hypertension                   |                      |                        |                        |                        |                          |
| <i>n</i> (%)                   | 1,653 (22.1)         | 138 (18.4)             | 152 (19.0)             | 154 (19.9)             | 195 (25.1)               |
| Unadjusted odds ratio (95% CI) | Reference            | 0.796<br>(0.656–0.965) | 0.824<br>(0.685–0.991) | 0.874<br>(0.726–1.051) | 1.180<br>(0.995–1.401)   |
| Adjusted odds ratio (95% CI)   | Reference            | 0.887<br>(0.719–1.094) | 0.865<br>(0.708–1.057) | 0.901<br>(0.737–1.103) | 1.014<br>(0.842–1.223)   |
| Osteoporosis                   |                      |                        |                        |                        |                          |
| <i>n</i> (%)                   | 169 (2.3)            | 17 (2.3)               | 23 (2.9)               | 26 (3.4)               | 169 (21.8)               |
| Unadjusted odds ratio (95% CI) | Reference            | 1.004<br>(0.606–1.663) | 1.277<br>(0.821–1.986) | 1.501<br>(0.986–2.284) | 12.018<br>(9.561–15.106) |
| Adjusted odds ratio (95% CI)   | Reference            | 1.025<br>(0.614–1.711) | 1.201<br>(0.766–1.884) | 1.389<br>(0.905–2.132) | 11.787<br>(9.249–15.021) |
| Diabetes                       |                      |                        |                        |                        |                          |
| <i>n</i> (%)                   | 852 (11.4)           | 75 (10.0)              | 114 (14.2)             | 91 (11.7)              | 154 (19.8)               |
| Unadjusted odds ratio (95% CI) | Reference            | 0.865<br>(0.674–1.110) | 1.288<br>(1.044–1.590) | 1.034<br>(0.822–1.302) | 1.922<br>(1.589–2.325)   |
| Adjusted odds ratio (95% CI)   | Reference            | 0.948<br>(0.734–1.225) | 1.384<br>(1.112–1.722) | 1.073<br>(0.846–1.361) | 1.771<br>(1.453–2.159)   |
| Anxiety/Neurosis               |                      |                        |                        |                        |                          |
| <i>n</i> (%)                   | 533 (7.1)            | 72 (9.6)               | 70 (8.7)               | 86 (11.1)              | 82 (10.6)                |
| Unadjusted odds ratio (95% CI) | Reference            | 1.385<br>(1.070–1.794) | 1.246<br>(0.960–1.616) | 1.626<br>(1.278–2.069) | 1.537<br>(1.203–1.964)   |
| Adjusted odds ratio (95% CI)   | Reference            | 1.317<br>(1.015–1.709) | 1.155<br>(0.889–1.502) | 1.506<br>(1.181–1.919) | 1.433<br>(1.119–1.835)   |
| Depression                     |                      |                        |                        |                        |                          |
| <i>n</i> (%)                   | 368 (4.9)            | 32 (4.3)               | 44 (5.5)               | 58 (7.5)               | 64 (8.2)                 |
| Unadjusted odds ratio (95% CI) | Reference            | 0.862<br>(0.596–1.247) | 1.121<br>(0.813–1.546) | 1.562<br>(1.172–2.083) | 1.734<br>(1.315–2.286)   |
| Adjusted odds ratio (95% CI)   | Reference            | 0.828<br>(0.572–1.199) | 1.073<br>(0.777–1.481) | 1.496<br>(1.121–1.996) | 1.708<br>(1.294–2.255)   |

CI confidence interval, SCS systemic corticosteroids, Q quartile

**Supplementary Table 4.** Total medical costs

|                                             | Non-SCS<br><i>N</i> = 7,476 | Q1<br><i>N</i> = 749   | Q2<br><i>N</i> = 802   | Q3<br><i>N</i> = 775   | Q4<br><i>N</i> = 777   |
|---------------------------------------------|-----------------------------|------------------------|------------------------|------------------------|------------------------|
| Total medical costs                         |                             |                        |                        |                        |                        |
| Mean, USD/year (95% CI)                     | 3,224<br>(3,017–3,431)      | 3,403<br>(2,744–4,061) | 3,968<br>(3,333–4,603) | 3,871<br>(3,228–4,514) | 7,847<br>(7,197–8,497) |
| Unadjusted difference,<br>USD/year (95% CI) | Reference                   | 179<br>(–512–869)      | 744<br>(77–1,412)      | 647<br>(–29–1,323)     | 4,623<br>(3,941–5,305) |
| Adjusted difference, USD/year (95% CI)      | Reference                   | 259<br>(–429–947)      | 774<br>(108–1,439)     | 655<br>(–18–1,329)     | 4,439<br>(3,759–5,119) |

*CI* confidence interval, *SCS* systemic corticosteroids, *Q* quartile, *USD* United States dollars

**Supplementary Table 5.** Drug treatment costs of asthma and comorbidities

|                                          | Non-SCS<br>N = 7,476 | Q1<br>N = 749    | Q2<br>N = 802    | Q3<br>N = 775    | Q4<br>N = 777          |
|------------------------------------------|----------------------|------------------|------------------|------------------|------------------------|
| <b>Asthma drug</b>                       |                      |                  |                  |                  |                        |
| Mean, USD/year (95% CI)                  | 571<br>(554–588)     | 618<br>(564–672) | 737<br>(685–789) | 837<br>(783–890) | 1,244<br>(1,190–1,297) |
| Unadjusted difference, USD/year (95% CI) | Reference            | 48<br>(–9–104)   | 166<br>(111–221) | 266<br>(210–322) | 673<br>(617–729)       |
| Adjusted difference, USD/year (95% CI)   | Reference            | 50<br>(–7–107)   | 166<br>(111–221) | 264<br>(208–320) | 661<br>(605–717)       |
| <b>Asthma drug (except SCS)</b>          |                      |                  |                  |                  |                        |
| Mean, USD/year (95% CI)                  | 570<br>(553–587)     | 615<br>(561–669) | 733<br>(681–785) | 827<br>(774–880) | 1,203<br>(1,150–1,256) |
| Unadjusted difference, USD/year (95% CI) | Reference            | 46<br>(–11–102)  | 164<br>(109–218) | 257<br>(202–313) | 633<br>(577–689)       |
| Adjusted difference, USD/year (95% CI)   | Reference            | 48<br>(–9–105)   | 163<br>(108–218) | 255<br>(200–311) | 622<br>(565–678)       |
| <b>Hypertension drug</b>                 |                      |                  |                  |                  |                        |
| Mean, USD/year (95% CI)                  | 61<br>(57–65)        | 51<br>(37–64)    | 54<br>(41–67)    | 59<br>(46–72)    | 66<br>(53–79)          |
| Unadjusted difference, USD/year (95% CI) | Reference            | –10<br>(–24–3)   | –7<br>(–20–6)    | –2<br>(–15–12)   | 5<br>(–9–19)           |
| Adjusted difference, USD/year (95% CI)   | Reference            | –4<br>(–17–9)    | –3<br>(–16–10)   | 2<br>(–11–15)    | –1<br>(–14–12)         |
| <b>Dyslipidaemia drug</b>                |                      |                  |                  |                  |                        |
| Mean, USD/year (95% CI)                  | 38<br>(35–40)        | 34<br>(25–43)    | 31<br>(23–40)    | 28<br>(20–37)    | 55<br>(46–64)          |
| Unadjusted difference, USD/year (95% CI) | Reference            | –4<br>(–13–5)    | –6<br>(–16–3)    | –9<br>(–18–0)    | 17<br>(8–27)           |
| Adjusted difference, USD/year (95% CI)   | Reference            | –1<br>(–11–8)    | –5<br>(–14–4)    | –9<br>(–18–0)    | 13<br>(3–22)           |
| <b>Diabetes drug</b>                     |                      |                  |                  |                  |                        |
| Mean, USD/year (95% CI)                  | 36<br>(32–41)        | 34<br>(19–48)    | 35<br>(21–50)    | 29<br>(15–44)    | 42<br>(27–56)          |
| Unadjusted difference, USD/year (95% CI) | Reference            | –2<br>(–18–13)   | –1<br>(–16–14)   | –7<br>(–22–8)    | 6<br>(–10–21)          |
| Adjusted difference, USD/year (95% CI)   | Reference            | 1<br>(–15–16)    | 1<br>(–13–16)    | –5<br>(–20–10)   | 2<br>(–13–18)          |

CI confidence interval, SCS systemic corticosteroids, Q quartile, USD United States dollars

**Supplementary Table 6.** Definition of asthma severity and control status

| Category                    | ERS/ATS criteria                                                    | Items used for criteria of control in this study (by using data available in the database) |                                                                                                                             |
|-----------------------------|---------------------------------------------------------------------|--------------------------------------------------------------------------------------------|-----------------------------------------------------------------------------------------------------------------------------|
|                             |                                                                     | Use of ERS/ATS criteria without alteration                                                 | Conversion from ERS/ATS criteria                                                                                            |
| Severe asthma               | GINA <sup>4</sup> Step 4–5                                          | x                                                                                          | Prescribed high-dosage ICS plus at least one other controller                                                               |
|                             | Use of systemic corticosteroids ≥50%                                | Number of days of prescriptions for systemic corticosteroids ≥183                          | —                                                                                                                           |
| Severe, uncontrolled asthma | ACQ >1.5<br>ACT <20                                                 | x                                                                                          | Number of SABA prescription records (≥208 attacks) <sup>a</sup>                                                             |
|                             | Short-term use of systemic corticosteroids ≥2 times (>3 times each) | x                                                                                          | At least two prescription records for short-term use of systemic corticosteroids or injectable corticosteroids <sup>b</sup> |
|                             | Hospitalization admission to ICU mechanical ventilation ≥1 time     | Number of hospitalizations for asthma <sup>c</sup><br>(emergency visits cannot be used)    | —                                                                                                                           |
|                             | Airflow limitation                                                  | x                                                                                          | x                                                                                                                           |

ERS/ATS European Respiratory Society and American Thoracic Society, ICU intensive care unit, ICS inhaled corticosteroids, LABA long-acting  $\beta_2$ -agonist, SABA short-acting  $\beta_2$ -agonist, OCS oral corticosteroids, GINA Global Initiative for Asthma, ACQ Asthma Control Questionnaire, ACT Asthma control test

<sup>a</sup>Refers to a description of one criterion of level of asthma symptom control in GINA 2017 – “Reliever needed more than twice/week (in the past 4 weeks)” – and considering real-world usage of SABA as 50% of each formulation. The number of inhalations per attack depends on the formulation.

<sup>b</sup>Refers to patients with at least two prescription records for short-term use of systemic corticosteroids or injectable corticosteroids  $\leq 12$  months prior to the index date. However, a minimum 14-day interval between the relevant record and the previous record was required.

<sup>c</sup>With at least one prescription of injectable corticosteroids.

×: data in the database could not be used as originally recorded. In these cases, criteria were altered so that data compiled in the database could be used (shown in the right column).

–: conversion of criteria was not necessary because data from the database could be used as originally recorded.

Note that the criterion for airflow limitation could not be appropriately converted and therefore was not used in this study.
